# Supplementary material
Source: MDPI journal article supplement (https://www.mdpi.com/2311-7524/7/9/280)
Supplement: s1 [file s1]

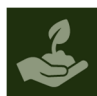

## Review

# Supplementary Materials: Advances in Genetics and Molecular Breeding of Broccoli

Fengqing Han<sup>1</sup>, Yumei Liu<sup>1</sup>, Zhiyuan Fang<sup>1</sup>, Limei Yang<sup>1</sup>, Mu Zhuang<sup>1</sup>, Yangyong Zhang<sup>1</sup>, Honghao Lv<sup>1</sup>, Yong Wang<sup>1</sup>, Jialei Ji<sup>1</sup> and Zhansheng Li<sup>1,\*</sup>

**Table S1.** Genetic mapping of genes/QTLs in broccoli.

| Traits                  | Genes/QTLs   | Chr/linkage group | Position (Mbp) | Donor                                                     | References |
|-------------------------|--------------|-------------------|----------------|-----------------------------------------------------------|------------|
| <b>Head</b>             |              |                   |                |                                                           |            |
| Bracting                | BR_C08@23.2; | 8;                | 23.2;          | Early Big (broccoli DH line);<br>TO1000DH3 (Chinese kale) | [33]       |
|                         | BR_C09@49.5  | 9                 | 49.5           |                                                           |            |
| Head compactness        | HC_C06@23.0; | 6;                | 23.0;          | Early Big (broccoli DH line);<br>TO1000DH3 (Chinese kale) | [33]       |
|                         | HC_C09@48.8  | 9                 | 48.8           |                                                           |            |
| Head diameter           | HD_C05@2.9;  | 5;                | 2.9;           | Early Big (broccoli DH line);<br>TO1000DH3 (Chinese kale) | [33]       |
|                         | HD_C07@43.6; | 7;                | 43.6;          |                                                           |            |
|                         | HD_C07@46.5  | 7                 | 46.5           |                                                           |            |
| Head uniformity         | HU_C04@34.2; | 4;                | 34.2;          | Early Big (broccoli DH line);<br>TO1000DH3 (Chinese kale) | [33]       |
|                         | HU_C09@5.6;  | 9;                | 5.6;           |                                                           |            |
|                         | HU_C09@48.8  | 9                 | 48.8           |                                                           |            |
| Head extension          | HE_C06@38.5; | 6;                | 38.5;          | Early Big (broccoli DH line);<br>TO1000DH3 (Chinese kale) | [33]       |
|                         | HE_C08@28.8; | 8;                | 28.8;          |                                                           |            |
|                         | HE_C09@47.7  | 9                 | 47.7           |                                                           |            |
| Head shape              | HS_C02@41.7  | 2;                | 41.7;          | Early Big (broccoli DH line);<br>TO1000DH3 (Chinese kale) | [33]       |
|                         | HS_C08@20.6  | 8;                | 20.6;          |                                                           |            |
|                         | HS_C09@37.1  | 9                 | 37.1           |                                                           |            |
| Overall-heading quality | OQ_C03@57.0  | 3;                | 57;            | Early Big (broccoli DH line);<br>TO1000DH3 (Chinese kale) | [33]       |
|                         | OQ_C04@33.3  | 4;                | 33.3;          |                                                           |            |
|                         | OQ_C08@24.0  | 8;                | 24;            |                                                           |            |
|                         | OQ_C09@49.5  | 9                 | 49.5           |                                                           |            |
| Shape of bud ends       | SE_C08@38.0  | 3                 | 55.7           | Early Big (broccoli DH line);                             | [33]       |

|                                        |                                                                      |                           |                                     |                                                                          |
|----------------------------------------|----------------------------------------------------------------------|---------------------------|-------------------------------------|--------------------------------------------------------------------------|
|                                        |                                                                      |                           |                                     | TO1000DH3 (Chinese kale)                                                 |
| "fig" shaped bud ends                  | SF_C04@50.3                                                          | 8                         | 38                                  | Early Big (broccoli DH [33] line);<br>TO1000DH3 (Chinese kale)           |
| Hooked sepals                          | SH_C01@2.1                                                           | 4                         | 50.3                                | Early Big (broccoli DH [33] line);<br>TO1000DH3 (Chinese kale)           |
| Side profile of unopened flower bud    | SS_C01@6.1                                                           | 1                         | 2.1                                 | Early Big (broccoli DH [33] line);<br>TO1000DH3 (Chinese kale)           |
| Sepal junction of unopened flower buds | ST_C01@3.2                                                           | 1                         | 6.1                                 | Early Big (broccoli DH [33] line);<br>TO1000DH3 (Chinese kale)           |
| Bead size                              | BS_C01@1.3<br>BS_C03@36.8<br>BS_C05@43.0<br>BS_C06@3.8<br>BS_C07@9.9 | 1;<br>3;<br>5;<br>6;<br>7 | 1.3;<br>36.8;<br>43;<br>3.8;<br>9.9 | Early Big (broccoli DH [33] line);<br>TO1000DH3 (Chinese kale)           |
| Bead uniformity                        | BU_C03@1.7<br>BU_C04@51.5                                            | 3;<br>4                   | 1.7;<br>51.5                        | Early Big (broccoli DH [33] line);<br>TO1000DH3 (Chinese kale)           |
| Curd quality (Subtropical adaptation)  | qCQ-2<br>qCQ-3<br>qCQ-6                                              | 2;<br>3;<br>6             | -                                   | BLM25 (broccoli); [21]<br>BLM29 (kale-derived broccoli)                  |
| Head diameter                          | Whri_HDIA_CO2.1_2002                                                 | C2(LG)                    | -                                   | GDDH33 (broccoli DH [43] line)<br>MarDH34 (broccoli DH line)             |
| Head weight                            | Whri_Hwt_CO9.1_2006                                                  | C9(LG)                    | -                                   | GDDH33 (broccoli DH [43] line)<br>MarDH34 (broccoli DH line)             |
| Top weight                             | TWT5                                                                 | LG5                       | -                                   | Green Magic (broccoli cultivar) [23]<br>Shin-Fa 1208 (broccoli cultivar) |

|                                      |                                                                                            |                  |            |                                  |      |
|--------------------------------------|--------------------------------------------------------------------------------------------|------------------|------------|----------------------------------|------|
| Head weight                          | HWT7                                                                                       | LG5              | -          | Green Magic (broccoli cultivar)  | [23] |
|                                      |                                                                                            |                  |            | Shin-Fa 1208 (broccoli cultivar) |      |
| Head height                          | HH2                                                                                        | LG2              | -          | Green Magic (broccoli cultivar)  | [23] |
|                                      |                                                                                            |                  |            | Shin-Fa 1208 (broccoli cultivar) |      |
| Head width                           | HW2                                                                                        | LG2              | -          | Green Magic (broccoli cultivar)  | [23] |
|                                      |                                                                                            |                  |            | Shin-Fa 1208 (broccoli cultivar) |      |
| Floret width                         | FW1                                                                                        | LG1              | -          | Green Magic (broccoli cultivar)  | [23] |
|                                      |                                                                                            |                  |            | Shin-Fa 1208 (broccoli cultivar) |      |
| Floret height                        | FH1                                                                                        | LG2              | -          | Green Magic (broccoli cultivar)  | [23] |
|                                      |                                                                                            |                  |            | Shin-Fa 1208 (broccoli cultivar) |      |
| Head weight                          | HW-1; HW-2; HW-3; HW-4; HW-5                                                               | B; F; E; F; D    | -          | VI-158 (calabrese broccoli)      | [42] |
|                                      |                                                                                            |                  |            | BNC (brocolette neri)            |      |
| <b>Flowering time /vernalization</b> |                                                                                            |                  |            |                                  |      |
| Vernalization                        | BRMS215–F2-R4b; E13M1-02–F4-R3b; FLC1–pW131; BRMS023–F3-R5d; BRMS085–pW240; BRMS008–F3-R4d | 2; 6; 2; 8; 9; 3 | -          | Green Comet (broccoli)           | [33] |
|                                      |                                                                                            |                  |            | Reiho (cabbage)                  |      |
| Flowering time                       | Ef2.1                                                                                      | 2                | 2.65–2.88  | 93219 (broccoli line)            | [34] |
|                                      |                                                                                            |                  |            | 195 (cabbage)                    |      |
| Flowering time                       | ec2h2-slg6; wg6fl0-wg7gl0; ec3b2-ec3el0                                                    | 2; 6; 8          | -          | OSU Cr-7 (broccoli line)         | [45] |
|                                      |                                                                                            |                  |            | Badger Inbred-16 (cabbage)       |      |
| Flowering time                       | FTO2.1; FTO5.1; FTO9.2;                                                                    | FTO3.1; FTO9.1;  | 2; 3; 5; 9 | GDDH33 (broccoli inbred line)    | [46] |
|                                      |                                                                                            |                  |            | A12DHd (Chinese kale)            |      |

|                           |                                |                  |                 |                                  |
|---------------------------|--------------------------------|------------------|-----------------|----------------------------------|
| Days to maturity;         | DM_C03@6.4;                    | 3;               | 6.4;            | Early Big (broccoli DH [33]      |
|                           | DM_C09@50.0;                   | 9;               | 50.0;           | line);                           |
| Days to flowering         | DF_C03@6.4;                    | 3;               | 6.4;            | TO1000DH3 (Chinese               |
|                           | DF_C09@50.0                    | 9                | 50.0            | kale)                            |
| Days to curd induction    | qDCI-3;                        | 3;               | -               | BLM25 (broccoli); [21]           |
|                           | qDCI-4;                        | 4;               |                 | BLM29 (kale-derived              |
| (Subtropical adaptation)  | qDCI-6;                        | 6;               |                 | broccoli)                        |
|                           | qDCI-7                         | 7                |                 |                                  |
| Maturity                  | MAT-1; MAT-2; MAT-3; MAT-4     | A; E; J; D       | -               | VI-158 (calabrese broccoli) [42] |
|                           |                                |                  |                 | BNC (brocolette neri)            |
| <b>Hollow Stem</b>        |                                |                  |                 |                                  |
| Hollow Stem               | QHS.C02-1; QHS.C02-2;          | 2; 2; ; 3; 3; 5; | 1.48–1.72;      | DH16-2 (broccoli DH [55]         |
|                           | QHS.C02-3;                     | 6; 9; 9          | 1.77–2.35;      | line);                           |
|                           | QHS.C03-1; QHS.C03-2; QHS.C05; |                  | 51.36–51.92;    | DH28-4 (broccoli DH              |
|                           | QHS.C06; QHS.C09-1;            |                  | 9.26–10.01;     | line)                            |
|                           | QHS.C09-2                      |                  | 13.16–16.00;    |                                  |
|                           |                                |                  | 40.94–40.99;    |                                  |
|                           |                                |                  | 23.91–24.51;    |                                  |
|                           |                                |                  | 49.98–50.16;    |                                  |
|                           |                                |                  | 49.98           |                                  |
| <b>Plant architecture</b> |                                |                  |                 |                                  |
| Lateral shoot growth      | LT_C03@5.9;                    | 3; 4; 9          | 5.1; 10.8; 7.4  | Early Big (broccoli DH [33]      |
|                           | LT_C04@15.0;                   |                  |                 | line);                           |
|                           | LT_C09@9.0                     |                  |                 | TO1000DH3 (Chinese               |
|                           |                                |                  |                 | kale)                            |
| Leaf apex                 | LA_C01@3.4;                    | 1; 3; 6; 7; 9    | 3.4; 0.7; 18.7; | Early Big (broccoli DH [33]      |
|                           | LA_C03@0.7;                    |                  | 37; 49.5        | line);                           |
|                           | LA_C06@18.7;                   |                  |                 | TO1000DH3 (Chinese               |
|                           | LA_C07@37.0;                   |                  |                 | kale)                            |
|                           | LA_C09@49.5                    |                  |                 |                                  |
| Leaf margin               | LM_C03@0.7;                    | 3;               | 0.7; 53.5; 39.5 | Early Big (broccoli DH [33]      |
|                           | LM_C03@53.5;                   | 3;               |                 | line);                           |
|                           | LM_C07@39.5                    | 7                |                 | TO1000DH3 (Chinese               |
|                           |                                |                  |                 | kale)                            |
| Stem width                | SW2                            | LG5              | -               | Green Magic (broccoli [23]       |
|                           |                                |                  |                 | cultivar)                        |
|                           |                                |                  |                 | Shin-Fa 1208 (broccoli           |
|                           |                                |                  |                 | cultivar)                        |
| Stalk diameter            | Whri_STKDIA_CO3.1_2007         | C3(LG)           | -               | GDDH33 (broccoli DH [43]         |
|                           |                                |                  |                 | line)                            |

|                              |                            |                |   |  |                              |      |
|------------------------------|----------------------------|----------------|---|--|------------------------------|------|
|                              |                            |                |   |  | MarDH34 (broccoli DH line)   |      |
| Lamina petiole length        | Whri_LPL_CO3.1             | C3(LG)         | - |  | GDDH33 (broccoli DH line)    | [43] |
|                              |                            |                |   |  | MarDH34 (broccoli DH line)   |      |
| Leaf shape                   | whri_LS_CO3.1_2007         | C3(LG)         | - |  | GDDH33 (broccoli DH line)    | [43] |
|                              |                            |                |   |  | MarDH34 (broccoli DH line)   |      |
| Lobe number                  | Whri_LN_CO3.1              | C3(LG)         | - |  | GDDH33 (broccoli DH line)    | [43] |
|                              |                            |                |   |  | MarDH34 (broccoli DH line)   |      |
| Wing number                  | Whri_WN_CO3.1              | C3(LG)         | - |  | GDDH33 (broccoli DH line)    | [43] |
|                              |                            |                |   |  | MarDH34 (broccoli DH line)   |      |
| Leaf shape                   | apex whri_LAS_CO6.1_2007   | C6(LG)         | - |  | GDDH33 (broccoli DH line)    | [43] |
|                              |                            |                |   |  | MarDH34 (broccoli DH line)   |      |
| Wing petiole length          | whri_WPL_CO7.1_2007        | C7(LG)         | - |  | GDDH33 (broccoli DH line)    | [43] |
|                              |                            |                |   |  | MarDH34 (broccoli DH line)   |      |
| Leaf length                  | whri_LL_CO7.1_2007         | C7(LG)         | - |  | GDDH33 (broccoli DH line)    | [43] |
|                              |                            |                |   |  | MarDH34 (broccoli DH line)   |      |
| Plant height                 | phc1; phc2; phc4-2; phc4-3 | C01; C02; C04; | - |  | 86101 (broccoli inbred line) | [52] |
|                              |                            |                |   |  | 90196 (broccoli inbred line) |      |
| Maximum outer petiole length | plc6-2                     | C06            | - |  | 86101 (broccoli inbred line) | [52] |
|                              |                            |                |   |  | 90196 (broccoli inbred line) |      |
| Leaf width                   | lwc1; lwc3-1               | C01; C03       | - |  | 86101 (broccoli inbred line) | [52] |

|                                        |              |                                                                   |                      |                     |                                                                                    |           |
|----------------------------------------|--------------|-------------------------------------------------------------------|----------------------|---------------------|------------------------------------------------------------------------------------|-----------|
|                                        |              |                                                                   |                      |                     | 90196 (broccoli inbred line)                                                       |           |
| <b>Head color</b>                      |              |                                                                   |                      |                     |                                                                                    |           |
| Purple trait                           | sepal        | qPH.C01–2; qPH.C01–4; qPH.C01–5                                   | LG1; LG1; LG1        | -                   | DH16–2 (broccoli line)<br>DH28–4 (broccoli line)                                   | DH [58]   |
| Green                                  |              | BoMYB2 (not activated)                                            | C06                  | 31.9                | Broccoli-1                                                                         | [57]      |
| <b>Abiotic stress</b>                  |              |                                                                   |                      |                     |                                                                                    |           |
| Head under temperature                 | quality high | QHT_C09; QHT_C05; QHT_C07; QHT_C03; QHT_C02; Q3 × Q5 <sup>c</sup> | 9; 5; 7; 3; 2; 3 × 5 | -                   | USVL138 (broccoli inbred line);<br>USVL108 (broccoli inbred line)                  | [15]      |
| Head under temperature                 | quality high | QHT_C06; QHT_C09.2;                                               | C06; C09             | 2.03-2.51; 2.1-2.97 | USVL118 (broccoli inbred line)<br>USVL123 (broccoli inbred line)                   | [15]      |
| Cuticular waxes (multiple resisitance) |              | Bo3g001070; Bo3g008780; Bo3g122030 (candidates)                   | C03                  | 0.04; 2.88; 43.12   | USVL115-NG; USVL115-GL; USVL188-NG; USVL188-GL                                     | [15]      |
| Cuticular waxes (multiple resisitance) |              | LC_C09@15.1                                                       | 9                    | 15.1                | Early Big (broccoli line); TO1000DH3 (Chinese kale)                                | DH [33]   |
| <b>Diseases resistance</b>             |              |                                                                   |                      |                     |                                                                                    |           |
| Downy mildew                           |              | Dm resistance                                                     | -                    | -                   | USVL809 (broccoli line)<br>USVL047 (broccoli line)                                 | DH [82]   |
| Downy mildew                           |              | Pp523                                                             | 8                    | 49.29-50.68         | GK97362 (rapid-cycling Brassica oleracea DH line)<br>S4 line of OL87125 (broccoli) | [79]      |
| Clubroot (isolate: Ms6)                |              | Pb-Bo1; Pb-Bo2; Pb-Bo5a; Pb-Bo5b; Pb-Bo9b                         | 1;2;5;5;9            | -                   | C10 (French landrace)<br>HDEM (DH broccoli)                                        | kale [95] |

|                                  |                                                                                                                            |                                                |   |                                                            |           |
|----------------------------------|----------------------------------------------------------------------------------------------------------------------------|------------------------------------------------|---|------------------------------------------------------------|-----------|
| Clubroot<br>(isolate: K92)       | Pb-Bo1; Pb-Bo2; Pb-Bo8                                                                                                     | 1; 2; 8                                        | - | C10 (French landrace)<br>HDEM (DH broccoli)                | kale [95] |
| Clubroot<br>(isolate: Pb137-522) | Pb-Bo1; Pb-Bo3                                                                                                             | 1; 3                                           | - | C10 (French landrace)<br>HDEM (DH broccoli)                | kale [95] |
| Clubroot<br>(isolate: K92-16)    | Pb-Bo1; Pb-Bo4; Pb-Bo5a                                                                                                    | 1; 4; 5                                        | - | C10 (French landrace)<br>HDEM (DH broccoli)                | kale [95] |
| Clubroot<br>(isolate: eH)        | Pb-Bo1; Pb-Bo2; Pb-Bo5a; Pb-Bo5b; Pb-Bo9a                                                                                  | 1; 2; 5; 5; 9                                  | - | C10 (French landrace)<br>HDEM (DH broccoli)                | kale [95] |
| Clubroot                         | PbBo(Anju)1;<br>PbBo(Anju)2;<br>PbBo(Anju)3;<br>PbBo(Anju)4;<br>PbBo(GC)1                                                  | 2; 2; 3; 7; 5                                  | - | Anju (cabbage cultivar)<br>Green Comet (broccoli cultivar) | [96]      |
| Black rot                        | XccBo(Reiho)1;<br>XccBo(Reiho)2;<br>XccBo(GC)1;                                                                            | C5; C8; C9                                     | - | GC P09 (DH broccoli)<br>Reiho P01 (DH cabbage)             | [104,105] |
| Black rot                        | wg2gll-vg6g5;<br>ec5e 12-ec2h2;<br>wg6hl-tg4d2b;<br>wg8a9b-wg4d7                                                           | 1; 2; 2; 9                                     | - | BI-16 (cabbage line)<br>OSU Cr-7 (broccoli line)           | [38]      |
| Black rot                        | Xcc1.1; Xcc6.1; Xcc8.1;<br>Xcc9.1                                                                                          | 1; 6; 8; 9                                     | - | Early Big (broccoli DH line);<br>TO1000DH3 (Chinese kale)  | [107]     |
| <b>Secondary metabolites</b>     |                                                                                                                            |                                                |   |                                                            |           |
| Glucosinolates                   | 2.1; 2.2; 3.1; 3.2; 3.3; 3.4;<br>4.1; 4.2; 5.1; 5.2; 6.1; 7.1;<br>7.2; 7.3; 7.4; 8.1; 9.1; 9.2                             | -                                              | - | Early Big (broccoli DH line);<br>TO1000DH3 (Chinese kale)  | [115]     |
| Glucosinolates                   | Gsl-01; Gsl-02; Gsl-03;<br>Gsl-04; Gsl-05; Gsl-06;<br>Gsl-07; Gsl-08; Gsl-09;<br>Gsl-10; Gsl-11; Gsl-12;<br>Gsl-13; Gsl-14 | 2; 2; 2; 3; 4;<br>4; 4; 5; 6; 7;<br>7; 9; 9; 9 | - | VI-158 (DH line)<br>BNC (brocolette neri-type broccoli)    | [116]     |

|                |                                                                        |                                                               |                                       |                                   |                                                              |       |
|----------------|------------------------------------------------------------------------|---------------------------------------------------------------|---------------------------------------|-----------------------------------|--------------------------------------------------------------|-------|
| Glucosinolates | qSF-C2;<br>qSF-C3-1;<br>qSF-C3-3;<br>qSF-C3-5;<br>qSF-C5-1;<br>qSF-C7; | qSF-C3-0;<br>qSF-C3-2;<br>qSF-C3-4;<br>qSF-C3-6;<br>qSF-C5-2; | 2; 3; 3; 3; 3;<br>3; 3; 3; 5; 5;<br>7 | -                                 | 86101 (broccoli inbred line)<br>90196 (broccoli inbred line) | [117] |
| Carotenoids    | bocarot1;<br>bocarot3                                                  | bocarot2;                                                     | C2; C6; C6                            | 13.1–21.7;<br>12.7–16.3;<br>45–46 | VI-158 (DH line)<br>BNC (brocolette neri-type broccoli)      | [118] |
| Phenolic       | no. 1 to no. 60                                                        | C1-C9                                                         | -                                     | -                                 | VI-158 (DH line)<br>BNC (brocolette neri-type broccoli)      | [119] |
| Phenolic       | 1.1 to 9.5                                                             | 1-9                                                           | -                                     | -                                 | Early Big (broccoli DH line);<br>TO1000DH3 (Chinese kale)    | [120] |
